# Supplementary material
Source: PubMed Central journal article supplement (PMC7081434)
Supplement: ao9b04339_si_001.pdf [file ao9b04339_si_001.pdf]

# SUPPORTING INFORMATION

## Predictions of High-Order Electric Properties of Molecules: Can We Benefit From Machine Learning?

Tran Tuan-Anh<sup>\*,†</sup> and Robert Zalesny<sup>\*,‡</sup>

*†Oxford University Clinical Research Unit, Wellcome Trust Major Overseas Programme  
Viet Nam, 764 Vo Van Kiet, Quan 5 Ho Chi Minh City, Vietnam*

*‡Department of Physical and Quantum Chemistry, Faculty of Chemistry, Wrocław  
University of Science and Technology, Wyb. Wyspiańskiego 27, PL-50370 Wrocław, Poland*

E-mail: tuan-anh.tran@linacre.ox.ac.uk; robert.zalesny@pwr.edu.pl

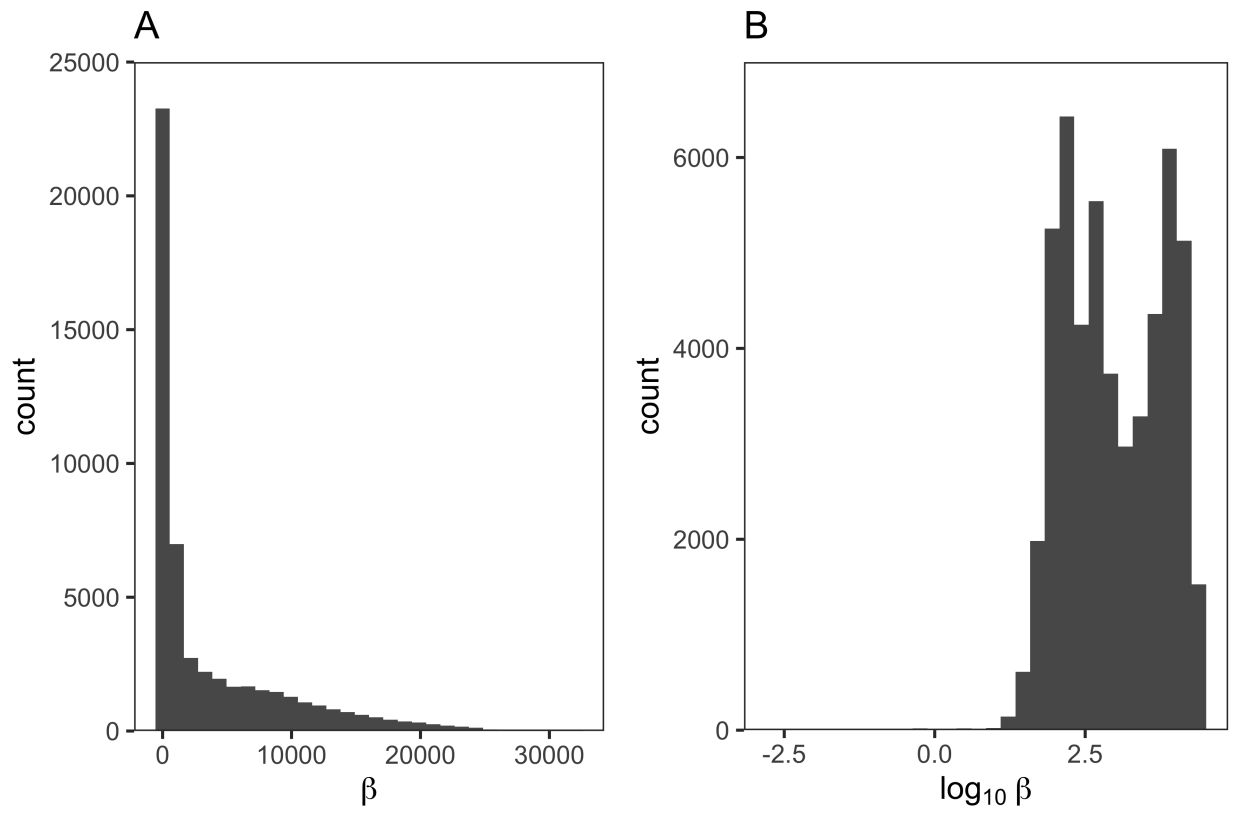

Figure S1: Histogram of (A) hyperpolarizability and (B) logarithmic transformation of hyperpolarizability.

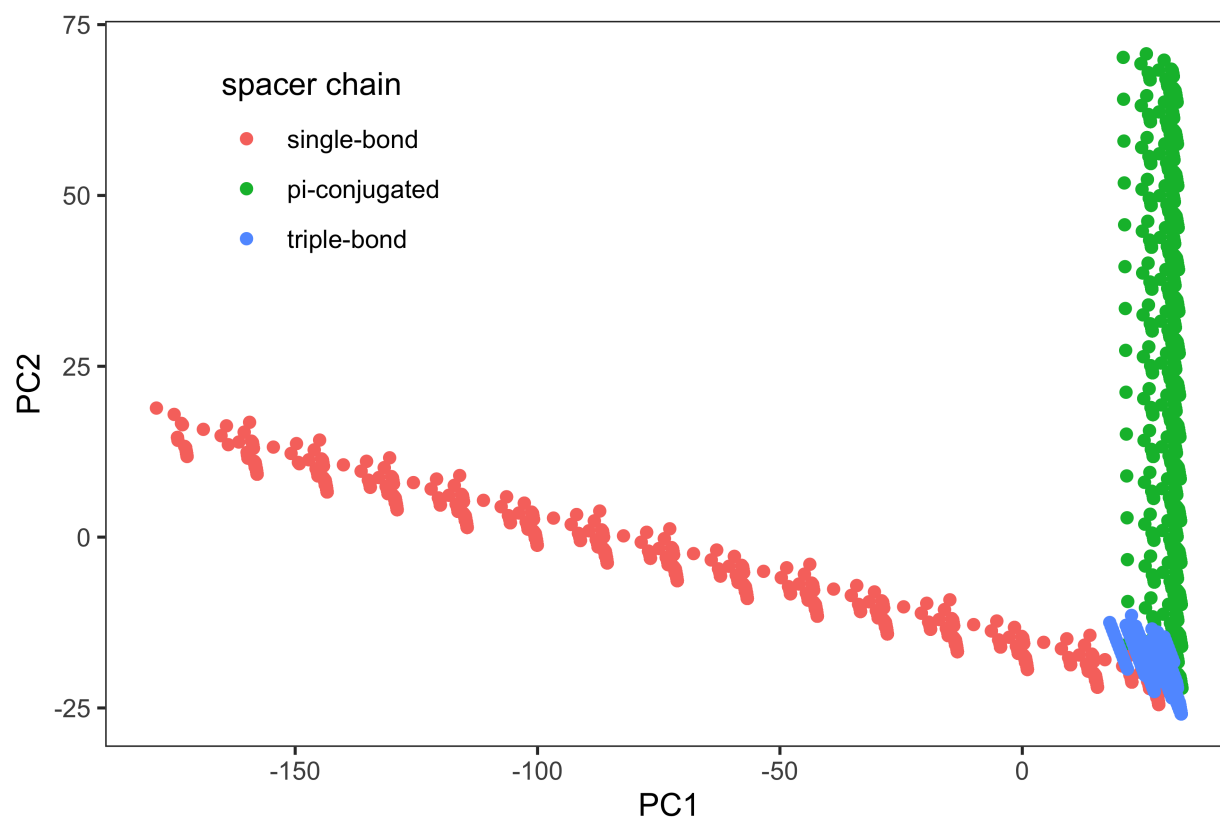

Figure S2: PCA plot based on the Klekota fingerprints for compounds containing single (red dots), alternating single/double (green dots), and single/triple (blue dots) carbon-carbon bonds
